# Supplementary material for: Oxygen vacancy enhanced catalytic activity in a Pt nanoparticle decorated GO–CexOycatalyst for the efficient synthesis of pyran based derivatives
Source: Royal Society of Chemistry journal article supplement (doi:10.1039/d3nj00605k), 2023-01-01
Supplement: d3nj00605k1.pdf [file d3nj00605k1.pdf]

## Supplementary Information

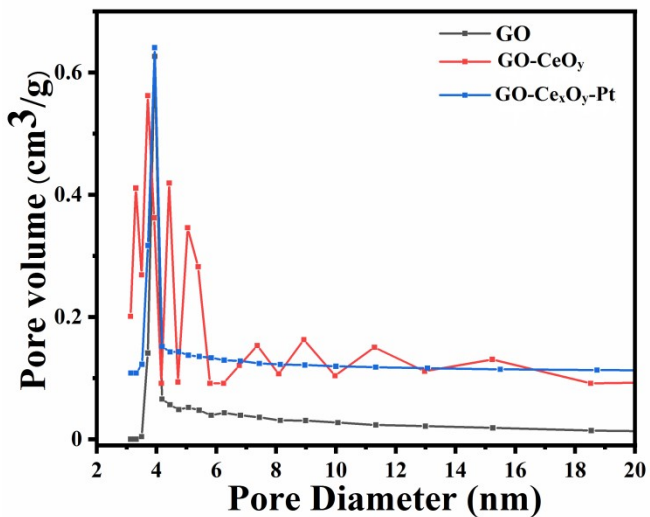

Fig. S1. BJH pore distribution curve of GO, GO-Ce<sub>x</sub>O<sub>y</sub> and GO-Ce<sub>x</sub>O<sub>y</sub>-Pt.

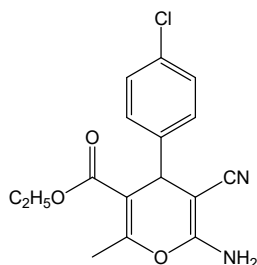

**Methyl 6-amino-5-cyano-4-(4-chlorophenyl)-4H-pyran-3-carboxylate** was synthesized by general procedure (mentioned in manuscript) and was purified by solvent system ethyl acetate : hexane (2 : 98,  $R_f = 0.48$ ) (6mg, 92% yield),  $^1\text{H NMR}$  (400 MHz, DMSO- $d_6$ ):  $\delta$  in ppm = 7.3 (2H, dd), 7.1 (2H, dd), 6.8 (2H, s,  $\text{NH}_2$ ), 5.1 (1H, s), 3.7 (3H, s,  $\text{CH}_3$ ), 4.9 (1H, s)  $^{13}\text{C NMR}$  (100 MHz, DMSO- $d_6$ ):  $\delta$  in ppm = 39.3, 52.3, 119.4, 107.2, 156.1, 168.1, 125.3, 121.8, 132.9, 157.2.

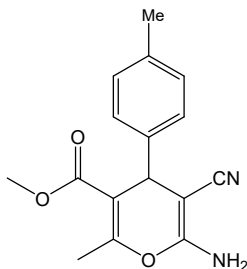

**Methyl 6-amino-5-cyano-4-(4-methylphenyl)-4H-pyran-3-carboxylate** was synthesized by general procedure (mentioned in manuscript) and was purified by solvent system ethyl acetate : hexane (2 : 98,  $R_f = 0.48$ ) ( 7mg, 90% yield),  $^1\text{H}$  NMR (400 MHz, DMSO- $d_6$ ):  $\delta$  in ppm =7.2 (2H, dd), 7.1 (2H, dd) , 6.8 (2H, s,  $\text{NH}_2$ ) ,5.1 (1H, s), 3.7 (3H, s,  $\text{CH}_3$ ), 4.9 (1H,s), 2.1 (3H,s)  $^{13}\text{C}$  NMR (100 MHz, DMSO- $d_6$ ):  $\delta$  in ppm = 21.2, 39.3, 52.3, 119.4, 107.2, 156.1, 168.1, 125.3, 121.8, 132.9, 157.2.

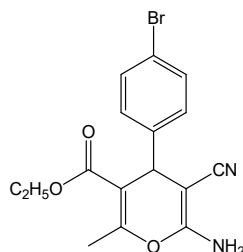

**Methyl 6-amino-5-cyano-4-(4-bromophenyl)-4H-pyran-3-carboxylate** was synthesized by general procedure (mentioned in manuscript) and was purified by solvent system ethyl acetate : hexane (2 : 98,  $R_f = 0.48$ ) ( 8mg, 91% yield),  $^1\text{H}$  NMR (400 MHz, DMSO- $d_6$ ):  $\delta$  in ppm =7.3 (2H, dd), 7.2 (2H, dd) , 6.8 (2H, s,  $\text{NH}_2$ ) ,5.1 (1H, s), 3.7 (3H, s,  $\text{CH}_3$ ), 4.9 (1H,s),  $^{13}\text{C}$  NMR (100 MHz, DMSO- $d_6$ ):  $\delta$  in ppm = 39.3, 52.3, 119.4, 107.2, 156.1, 168.1, 125.3, 121.8, 132.9, 1

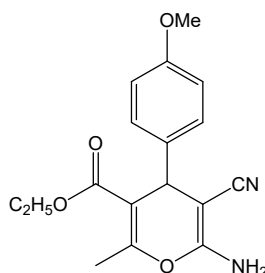

**Methyl 6-amino-5-cyano-4-(4-methoxyphenyl)-4H-pyran-3-carboxylate** was synthesized by general procedure (mentioned in manuscript) and was purified by solvent system ethyl acetate : hexane (2 : 98,  $R_f = 0.48$ ) ( 7mg, 90% yield),  $^1\text{H}$  NMR (400 MHz, DMSO- $d_6$ ):  $\delta$  in ppm =7.2 (2H, dd), 7.0 (2H, dd) , 6.8 (2H, s,  $\text{NH}_2$ ) ,5.1 (1H, s), 3.7 (3H, s,  $\text{CH}_3$ ), 4.9 (1H,s), 3.9 (3H, s),  $^{13}\text{C}$  NMR (100 MHz, DMSO- $d_6$ ):  $\delta$  in ppm = 39.3, 41.2, 52.3, 119.4, 107.2, 156.1, 168.1, 125.3, 121.8, 132.9, 157.2.

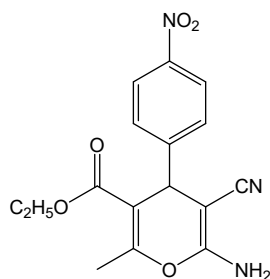

**Methyl 6-amino-5-cyano-4-(4-nitrophenyl)-4H-pyran-3-carboxylate** was synthesized by general procedure (mentioned in manuscript) and was purified by solvent system ethyl acetate : hexane (4 : 96,  $R_f$  = 0.46) ( 6mg, 94% yield),  $^1\text{H}$  NMR (400 MHz, DMSO- $d_6$ ):  $\delta$  in ppm =8.4 (2H, dd), 7.4 (2H, dd) , 6.8 (2H, s,  $\text{NH}_2$ ) ,5.1 (1H, s), 3.7 (3H, s,  $\text{CH}_3$ ), 4.9 (1H,s)  $^{13}\text{C}$  NMR (100 MHz, DMSO- $d_6$ ):  $\delta$  in ppm = 39.3, 52.3, 119.4, 107.2, 156.1, 168.1, 125.3, 121.8, 142.9, 167.2
